# Supplementary material for: A High‐End Estimate of Sea Level Rise for Practitioners
Source: PubMed Central journal article supplement — Earths Future. 2022 Nov 7;10(11):e2022EF002751. doi: 10.1029/2022EF002751 (PMC9787942; doi:10.1029/2022ef002751), 2022-11-07
Supplement: EFT2-10-e2022EF002751-s001.pdf [file EFT2-10-e2022EF002751-s001.pdf]

**A high-end estimate of sea-level rise for practitioners**

**R. S. W. van de Wal<sup>1,2</sup>, R. J. Nicholls<sup>3</sup>, D. Behar<sup>4</sup>, K. McInnes<sup>5</sup>, D. Stammer<sup>6</sup>, J. A. Lowe<sup>7,8</sup>, J. A. Church<sup>9,10</sup>, R. DeConto<sup>11</sup>, X. Fettweis<sup>12</sup>, H. Goelzer<sup>13</sup>, M. Haasnoot<sup>14</sup>, I. D. Haigh<sup>15</sup>, J. Hinkel<sup>16</sup>, B. Horton<sup>17,18</sup>, T. S. James<sup>19</sup>, A. Jenkins<sup>20</sup>, G. LeCozannet<sup>21</sup>, A. Levermann<sup>22,23,24</sup>, W. H. Lipscomb<sup>25</sup>, B. Marzeion<sup>26</sup>, F. Pattyn<sup>27</sup>, T. Payne<sup>28</sup>, T. Pfeffer<sup>29</sup>, S. F. Price<sup>30</sup>, H. Serroussi<sup>31</sup>, S. Sun<sup>32</sup>, W. Veatch<sup>33</sup>, K. White<sup>34</sup>**

<sup>1</sup>Institute for Marine and Atmospheric Research Utrecht, Utrecht University, Netherlands

<sup>2</sup>Department of Physical Geography, Utrecht University, Netherlands

<sup>3</sup>Tyndall Centre for Climate Change Research, University of East Anglia, United Kingdom

<sup>4</sup>San Francisco Public Utilities Commission, United States

<sup>5</sup>Climate Change Research Centre, UNSW Australia, Sydney, Australia

<sup>6</sup>Centrum für Erdsystemforschung und Nachhaltigkeit, Universität Hamburg, Germany

<sup>7</sup>Met Office Hadley Centre, Exeter, United Kingdom

<sup>8</sup>Priestley Centre, University of Leeds, United Kingdom

<sup>9</sup>Climate Change Research Centre, University of New South Wales, Sydney, Australia

<sup>10</sup>Australian Centre for Excellence in Antarctic Science (ACEAS), University of Tasmania, Australia

<sup>11</sup>Department of Geosciences, University of Massachusetts-Amherst, United States

<sup>12</sup>Department of Geography, SPHERES research unit, University of Liège, Belgium

<sup>13</sup>NORCE Norwegian Research Centre, Bjerknes Centre for Climate Research, Bergen, Norway

<sup>14</sup>Deltares, Netherlands

<sup>15</sup>School of Ocean and Earth Science, University of Southampton, National Oceanography Centre, United Kingdom

<sup>16</sup>Adaptation and Social Learning, Global Climate Forum, Berlin, Germany

<sup>17</sup>Earth Observatory of Singapore, Nanyang Technological University, Singapore

<sup>18</sup>Asian School of the Environment, Nanyang Technological University, Singapore

<sup>19</sup>Natural Resources Canada, Geological Survey of Canada, Sidney, Canada

<sup>20</sup>Department of Geography and Environmental Sciences, Northumbria University, Newcastle upon Tyne, United Kingdom

<sup>21</sup>Coastal Risks and Climate Change unit, Risks and Prevention Division, BRGM, Orléans, France

<sup>22</sup>Potsdam Institute for Climate Impact Research, Potsdam, Germany

<sup>23</sup>LDEO, Columbia University, New York, USA

<sup>24</sup>Physics Institute, University of Potsdam, Potsdam, Germany

<sup>25</sup>Climate and Global Dynamics Laboratory, National Center for Atmospheric Research, Boulder, CO, United States

- <sup>26</sup>Institute of Geography and MARUM - Center for Marine Environmental Sciences, University of Bremen, Bremen, Germany
- <sup>27</sup>Laboratoire de Glaciologie, Université libre de Bruxelles, Brussels, Belgium
- <sup>28</sup>School of Geographical Sciences, University of Bristol, United Kingdom.
- <sup>29</sup>INSTAAR and Department of Civil, Environmental, Architectural Engineering University of Colorado, United States
- <sup>30</sup>Theoretical Division, Los Alamos National Laboratory, United States
- <sup>31</sup>Thayer School of Engineering, Dartmouth College, Hanover, United States
- <sup>32</sup>Department of Geography and Environmental Sciences, Northumbria University, Newcastle upon Tyne, United Kingdom
- <sup>33</sup>US Army Corps of Engineers, New Orleans, United States
- <sup>34</sup>US Army Corps of Engineers, Institute for water resources, Washington, United States

## Contents of this file

Tables S1

## Introduction

Table S1 explains the contribution of the different authors to the process.

**Table S1. Summary of the main contributions of the different authors to the different sections. Initials are used and ordered according to the author list. Bold initials are considered to be practitioners or to understand the practitioner perspective. Columns 2 and 3 characterize the authors with a clear bias to Europe, US and senior males. Only SS qualifies as ECR. The crosses indicate who contributed to the initial drafting of a section.**

| Author     | Gender | Nationality | Practitioner Section | Glacier Section | Greenland Section | Antarctica Section | Lines of Evidence Section | Discussion/ Workshop |
|------------|--------|-------------|----------------------|-----------------|-------------------|--------------------|---------------------------|----------------------|
| RvdW       | M      | Netherlands |                      | X               | X                 | X                  | X                         | X                    |
| <b>RN</b>  | M      | UK          | X                    |                 |                   |                    | X                         | X                    |
| <b>DB</b>  | M      | USA         | X                    |                 |                   |                    |                           | X                    |
| KM         | F      | Australia   | X                    |                 |                   |                    | X                         | X                    |
| DS         | M      | Germany     |                      |                 |                   |                    | X                         | X                    |
| <b>JL</b>  | M      | UK          | X                    |                 |                   |                    | X                         | X                    |
| JC         | M      | Australia   |                      |                 |                   |                    |                           | X                    |
| RD         | M      | USA/Italy   |                      |                 |                   | X                  |                           | X                    |
| XF         | M      | Belgium     |                      |                 | X                 |                    |                           | X                    |
| HG         | M      | Germany     |                      |                 | X                 |                    |                           | X                    |
| <b>MH</b>  | F      | Netherlands |                      |                 |                   |                    |                           | X                    |
| <b>IH</b>  | M      | UK          | X                    |                 |                   |                    |                           | X                    |
| <b>JH</b>  | M      | Germany     | X                    |                 |                   |                    |                           | X                    |
| BH         | M      | UK          |                      |                 |                   |                    |                           | X                    |
| <b>TSJ</b> | M      | Canada      |                      |                 |                   |                    |                           | X                    |
| AJ         | M      | UK          |                      |                 |                   | X                  |                           | X                    |
| <b>GL</b>  | M      | France      |                      |                 |                   |                    |                           | X                    |

|    |   |         |  |   |  |   |  |   |
|----|---|---------|--|---|--|---|--|---|
| AL | M | Germany |  |   |  |   |  | X |
| WL | M | USA     |  |   |  | X |  | X |
| BM | M | Germany |  | X |  |   |  | X |
